# Supplementary material
Source: PubMed Central journal article supplement (PMC5804356)

# Supplementary Figure 1

Uncropped scans with size marker indications

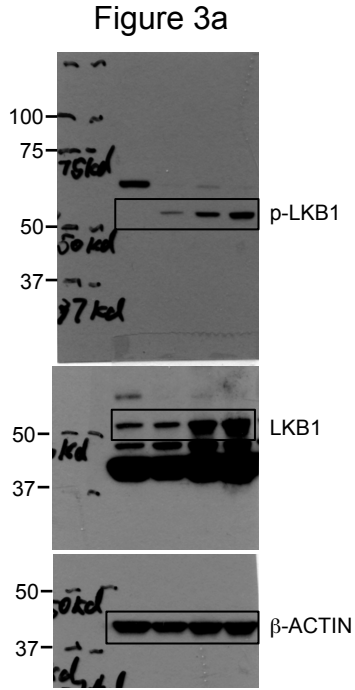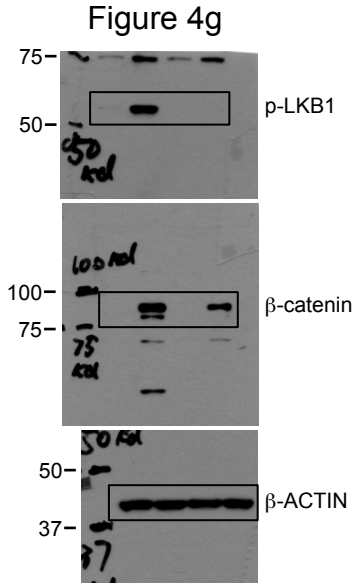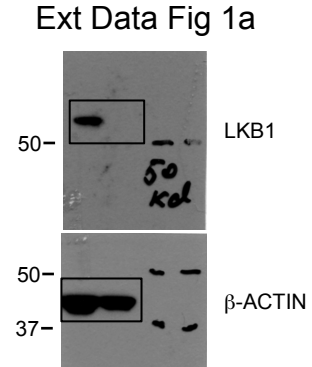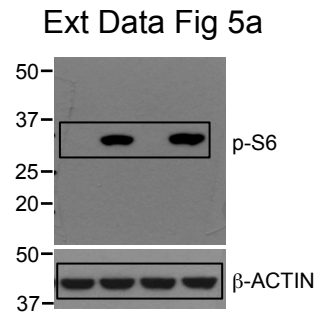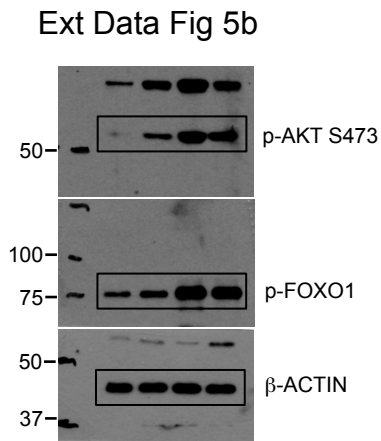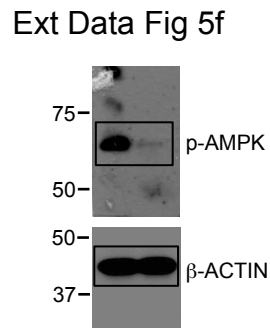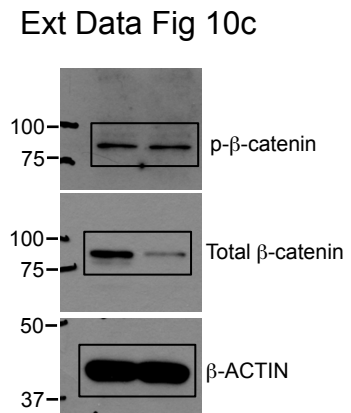

Supplement: NIHMS894686-supplement-Supplementary_Figure_1.pdf [file NIHMS894686-supplement-Supplementary_Figure_1.pdf]
